# Supplementary material for: Ionophore Antibiotics Inhibit Type II Feline Coronavirus Proliferation In Vitro
Source: MDPI journal article supplement (doi:10.3390/v14081734), 2022-08-06
Supplement: s1 [file s1]

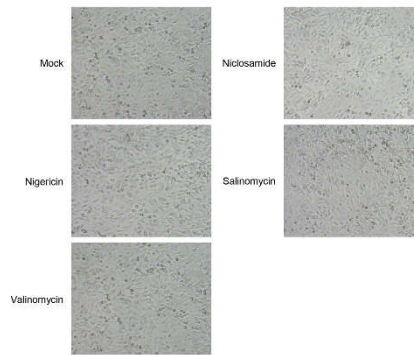

**Figure S1.** Cytotoxicity of each ionophore antibiotic on the Fcwf-4 cells. Each ionophore antibiotic does not obviously affect cell morphology. The Fcwf-4 cells were incubated with niclosamide (0.8  $\mu$ M), nigericin (6.3  $\mu$ M), salinomycin (12.5  $\mu$ M), and valinomycin (25  $\mu$ M) for 20 h at 37 °C. Original magnification,  $\times 100$ . Fcwf, *Felis catus* whole fetus-4
